# Supplementary material
Source: HighWire-hosted journal article supplement (https://bmjopen.bmj.com/content/12/3/e055596)

Numéro de protocole DRC-EB-001  
Ad26-MVA étude TUJIOKOWE

ICF du sous-groupe Immunogénicité pour les ADULTES  
V1.1 Français 10 août 2020

**Protocol for a phase 3 trial to evaluate the effectiveness and safety of a heterologous, two-dose vaccine for Ebola virus disease in the Democratic Republic of the Congo**

**Appendix 3B**

Immunogenicity Informed Consent Form for adults in French, Version 1.1 (10 Aug 2020)

Numéro de protocole DRC-EB-001  
Ad26-MVA étude TUJIOKOWE

ICF du sous-groupe Immunogénicité pour les ADULTES  
V1.1 Français 10 août 2020

## **Évaluation de l'efficacité et de la sécurité d'emploi d'un vaccin préventif hétérologue à deux doses contre Ebola en République démocratique du Congo**

### **Note d'information et formulaire de consentement éclairé pour le sous-groupe Immunogénicité de l'« étude TUJIOKOWE »**

**Protocole LSHTM : DRC-EB-001**

**Investigateur principal (IP) :**

Professeur Jean Jacques Muyembe

*Directeur général*

Institut national de recherche biomédicale

Professeur de microbiologie, Faculté de médecine de l'Université de Kinshasa

Kinshasa Gombe, République démocratique du Congo (RDC)

Téléphone : 0898 949 289 ; adresse électronique : jjmuyembet@gmail.com

**Promoteur :** London School of Hygiene & Tropical Medicine, Royaume-Uni

**Centre :** République démocratique du Congo

## **INTRODUCTION**

L'« étude TUJIOKOWE » est une étude de recherche visant à déterminer si un nouveau vaccin à deux doses appelé « vaccin contre le virus Ebola de Janssen » peut protéger contre le virus Ebola et à vérifier si le vaccin est sans danger. L'étude TUJIOKOWE est mise en œuvre par le ministère de la Santé de la RDC par l'intermédiaire de l'Institut national de recherche biomédicale (INRB), Epicentre et la London School of Hygiene & Tropical Medicine.

Lorsque nous avons commencé l'étude TUJIOKOWE, nous avons prévu d'administrer la seconde dose du vaccin contre le virus Ebola à tous les participants 2 mois environ après la première dose. Certaines personnes vont maintenant recevoir la seconde dose du vaccin contre le virus Ebola plus tard que prévu. Cela s'explique par la nécessité de fermer temporairement les centres de l'étude en raison de l'épidémie de COVID-19. Nous voulons comprendre si les personnes qui reçoivent leur seconde dose de vaccin plus de 2 mois après présentent la même réponse immunitaire que les personnes qui l'ont reçue 2 mois après la première dose. À cet effet, nous allons devoir prélever des échantillons de sang auprès de 50 adultes, 25 adolescents et 25 enfants environ participant à l'étude TUJIOKOWE, qui ont reçu la seconde dose du vaccin contre le virus Ebola après juillet 2020. Nous vous demandons de participer à cette petite étude (que nous appelons « sous-groupe Immunogénicité ») et de fournir deux échantillons de sang, car vous allez recevoir la seconde dose du vaccin après juillet 2020. Si vous acceptez de participer à l'étude, un échantillon de sang vous sera prélevé avant l'administration de la seconde dose du vaccin contre le virus Ebola, et le second échantillon de sang sera prélevé 21 jours plus tard.

Numéro de protocole DRC-EB-001  
Ad26-MVA étude TUJIOKOWE

ICF du sous-groupe Immunogénicité pour les ADULTES  
V1.1 Français 10 août 2020

Nous voulons nous assurer que votre organisme réagit au vaccin aussi bien que celui des personnes qui ont reçu la seconde dose du vaccin 2 mois après la première dose. À cet effet, nous allons rechercher les anticorps que produit votre organisme après l'administration du vaccin. Les anticorps sont produits par l'organisme après la vaccination pour vous protéger contre l'infection. Les informations obtenues en analysant votre sang pour rechercher la présence d'anticorps seront très importantes lorsque le vaccin sera utilisé pour protéger contre le virus Ebola à l'avenir, car il ne sera peut-être pas toujours possible d'administrer la seconde dose du vaccin 2 mois exactement après la première dose.

Si vous êtes le parent ou le tuteur d'un enfant de moins de 18 ans et si vous acceptez qu'il fournisse les échantillons de sang, vous devrez signer des documents distincts pour vous et votre enfant. Si votre enfant est âgé de 12 à 17 ans, il devra également accepter de lui-même de fournir les échantillons de sang et signer un autre document, appelé « formulaire d'assentiment » pour le sous-groupe Immunogénicité.

### **SUIS-JE OBLIGÉ DE DONNER DES ÉCHANTILLONS DE SANG ?**

Vous n'avez pas l'obligation de fournir des échantillons de sang. Si vous acceptez de fournir des échantillons de sang, nous vous inviterons à signer ce formulaire de consentement. Si vous ne souhaitez pas donner d'échantillons de sang, cela ne remettra pas en cause votre participation à l'étude TUJIOKOWE.

### **QUE SE PASSERA-T-IL SI J'ACCEPTÉ DE DONNER DES ÉCHANTILLONS DE SANG ?**

Nous allons décrire les modalités de prise de sang et répondre à toutes les questions que vous pourriez avoir. Si vous souhaitez une copie de cette note d'information, nous vous la remettons. Nous vous inviterons à signer ce formulaire de consentement ou à y apposer votre empreinte digitale. En inscrivant votre nom ou en apposant votre empreinte digitale sur le formulaire de consentement, vous acceptez de fournir des échantillons de sang, mais vous pourrez changer d'avis à tout moment.

Une fois que vous aurez donné votre premier échantillon de sang, vous suivrez les procédures habituelles de l'étude TUJIOKOWE pour recevoir la seconde dose de vaccin. Pour le prélèvement de votre second échantillon de sang, vous devrez venir effectuer une visite supplémentaire au centre de l'étude 21 jours après l'administration de la seconde dose de vaccin. Si vous participez au sous-groupe Immunogénicité, chaque fois que vous donnerez votre sang, nous vous donnerons des rafraîchissements.

Numéro de protocole DRC-EB-001  
Ad26-MVA étude TUJIOKOWE

ICF du sous-groupe Immunogénicité pour les ADULTES  
V1.1 Français 10 août 2020

## **EN QUOI CONSISTE LE PRELEVEMENT DE SANG ?**

Une petite quantité de votre sang vous sera prélevée à l'aide d'une petite aiguille propre. Nous vous prélèverons un échantillon de sang avant que vous receviez la seconde injection du vaccin et 21 jours après la seconde injection. Pour le prélèvement de votre second échantillon de sang, vous devrez effectuer une visite supplémentaire au centre de l'étude 21 jours après l'administration de la seconde dose de vaccin. Pour les adultes, nous prélèverons 5 ml environ (soit 1 cuillère à café environ) de sang chaque fois que vous fournirez un échantillon de sang.

Comme indiqué précédemment, les échantillons de sang que vous donnerez serviront à vérifier si votre organisme a produit des anticorps dans votre sang contre le virus Ebola après la vaccination. Vous ne recevrez pas les résultats de ces analyses, car ils sont destinés uniquement à la recherche scientifique.

Après avoir réalisé nos analyses sur vos échantillons de sang pour le sous-groupe Immunogénicité de l'étude TUJIOKOWE, nous détruirons tous les échantillons de sang restants qui vous ont été prélevés. Nous n'utiliserons pas vos échantillons de sang à d'autres fins que les analyses de détection d'anticorps mentionnés dans ce formulaire de consentement. Vos échantillons de sang ne seront pas vendus.

Vos échantillons de sang seront étiquetés avec un code et non avec votre nom. D'autres informations, comme le sexe, l'âge ou les antécédents médicaux, pourront également être partagées avec d'autres investigateurs, mais votre nom ne sera pas communiqué.

## **QUELS SONT LES RISQUES EVENTUELS LIES AU DON D'UN ECHANTILLON DE SANG ?**

Le prélèvement d'un échantillon de sang est généralement sans danger, mais il arrive que des personnes ressentent des douleurs ou présentent un bleu, un saignement ou (dans de très rares cas) une infection après un prélèvement de sang. Si vous présentez des effets secondaires après la prise de sang, l'équipe médicale vous apportera les soins nécessaires. L'équipe est disponible à tout moment si vous avez des problèmes ou des questions.

## **QUELS SONT LES BENEFICES LIES AU DON D'UN ECHANTILLON DE SANG ?**

Il n'y a aucun bénéfice direct pour vous à fournir des échantillons de sang dans le cadre du sous-groupe Immunogénicité de l'étude TUJIOKOWE. Le consentement à fournir des échantillons de sang contribuera au développement de vaccins pour prévenir le virus Ebola et, à l'avenir, pourrait aider des personnes dans différentes régions du monde.

## **QU'ADVIENDRA-IL DES ECHANTILLONS DE SANG QUI ME SERONT PRELEVES ?**

Les échantillons de sang qui vous ont été prélevés dans le cadre du sous-groupe Immunogénicité de l'étude TUJIOKOWE ne seront utilisés que pour comprendre l'efficacité du vaccin contre le virus Ebola lorsque la seconde dose est administrée plus de 2 mois après la première dose.

Numéro de protocole DRC-EB-001  
Ad26-MVA étude TUJIOKOWE

ICF du sous-groupe Immunogénicité pour les ADULTES  
V1.1 Français 10 août 2020

Les échantillons seront codés de manière à limiter le nombre de membres du personnel de l'étude qui peut les relier à vous. Vos échantillons de sang seront analysés dans un laboratoire aux États-Unis. S'il reste des échantillons de sang en RDC, ils seront conservés dans le laboratoire de l'INRB à Goma. Nous détruirons tous les échantillons conservés aux États-Unis et à Goma à la fin de l'étude.

### **À QUI PUIS-JE M'ADRESSER CONCERNANT LE PRÉLÈVEMENT D'ÉCHANTILLONS DE SANG ?**

Si vous souhaitez parler à quelqu'un du prélèvement d'un échantillon de sang ou si vous pensez avoir subi un préjudice en fournissant un échantillon de sang, vous pouvez contacter les personnes suivantes :

1) Investigateur principal responsable de cette étude

Professeur Jean Jacques Muyembe  
*Directeur général*, Institut national de recherche biomédicale, Kinshasa, RDC  
Téléphone : 0898 949 289  
Adresse électronique : jjmuyembet@gmail.com

Représentant locale de l'étude  
Dr Hugo Kavunga  
Téléphone : 0823 875 153  
Adresse électronique : hugokavunga@gmail.com

2) Comités d'éthique de la RDC ayant approuvé cette étude

Professeur Félicien Munday  
Comité national d'éthique et de la santé  
Kinshasa-Gombe, RDC  
Téléphone : 0998 419 816  
Adresse électronique : felimunday@yahoo.fr

Professeur Willy Bongopasi  
Comité d'éthique de l'école de santé publique  
Université de Kinshasa, RDC  
Téléphone : 0999 952 341  
Adresse électronique : bongopasi@gmail.com

Si vous avez des questions sur le prélèvement d'échantillons de sang pour le sous-groupe Immunogénicité de l'étude TUJIOKOWE ou sur vos droits, vous pouvez les poser à tout moment à n'importe quel membre de l'équipe de l'étude.

Numéro de protocole DRC-EB-001  
Ad26-MVA étude TUJIOKOWE

ICF du sous-groupe Immunogénicité pour les ADULTES  
V1.1 Français 10 août 2020

## FORMULAIRE DE CONSENTEMENT DES PARTICIPANTS POUR LE SOUS-GROUPE IMMUNOGÉNICITÉ

**Titre : Sous-groupe Immunogénicité de l'étude TUJIOKOWE**

**Investigateur principal de cette étude : Prof. JJ Muyembe**

| Déclarations                                                                                                                                                                                                                                                                                                                                                                                                                                                                                    | Signez ou apposez votre empreinte digitale dans chaque case |
|-------------------------------------------------------------------------------------------------------------------------------------------------------------------------------------------------------------------------------------------------------------------------------------------------------------------------------------------------------------------------------------------------------------------------------------------------------------------------------------------------|-------------------------------------------------------------|
| <p>J'ai lu les informations contenues dans ce formulaire sur le prélèvement d'un échantillon de sang lors de deux visites pour le sous-groupe Immunogénicité de l'étude TUJIOKOWE (ou le personnel de l'étude m'a expliqué ces informations avec des mots que je comprends). L'objectif du prélèvement d'échantillons de sang et les procédures correspondantes m'ont été expliqués en détail. J'ai pu poser des questions et j'ai reçu des réponses satisfaisantes à toutes mes questions.</p> |                                                             |
| <p>Je comprends que ma participation est volontaire, que je peux retirer son consentement à fournir des échantillons de sang à tout moment sans avoir à me justifier et que cela ne remettra pas en cause ma participation à l'étude TUJIOKOWE.</p>                                                                                                                                                                                                                                             |                                                             |

**J'ai 18 ans ou plus et j'accepte de fournir des échantillons de sang pour le sous-groupe Immunogénicité pendant ma participation à l'étude TUJIOKOWE.** (Signez ou apposez votre empreinte digitale ci-dessous)

|                                                        |                                                    |                                       |
|--------------------------------------------------------|----------------------------------------------------|---------------------------------------|
|                                                        |                                                    | <p>____/____/____<br/>jj mmm aaaa</p> |
| Nom du participant adulte (en caractères d'imprimerie) | Signature/Empreinte digitale du participant adulte | Date                                  |

|                                                     |                              |                                       |
|-----------------------------------------------------|------------------------------|---------------------------------------|
|                                                     |                              | <p>____/____/____<br/>jj mmm aaaa</p> |
| Nom de l'investigateur (en caractères d'imprimerie) | Signature de l'investigateur | Date                                  |

Numéro de protocole DRC-EB-001  
Ad26-MVA étude TUJIOKOWE

ICF du sous-groupe Immunogénicité pour les ADULTES  
V1.1 Français 10 août 2020

*Si le participant est analphabète, remplissez cette section :*

### Témoin de l'entretien de consentement

J'ai assisté à l'entretien de consentement pour le sous-groupe Immunogénicité de l'étude TUJIOKOWE décrite dans ce document. J'atteste avoir expliqué avec exactitude les informations sur l'étude au participant ou au parent/tuteur et que, à ma connaissance, le participant les a comprises et a donné librement son consentement à participer, en ma présence.

|  |  |                               |
|--|--|-------------------------------|
|  |  | ____/____/____<br>jj mmm aaaa |
|--|--|-------------------------------|

Nom du témoin impartial (en caractères  
d'imprimerie)

Signature du témoin impartial

Date

Apposez l'étiquette d'identification par code à barres ci-dessous :

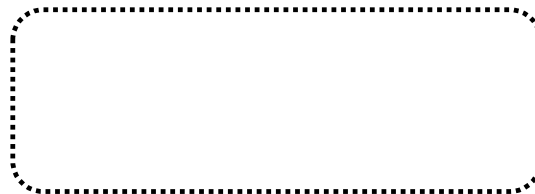

Supplement: inline-supplementary-material-9 [file inline-supplementary-material-9.pdf]
