# Supplementary material
Source: HighWire-hosted journal article supplement (https://bmjopen.bmj.com/content/12/3/e055596)
Supplement: inline-supplementary-material-11 [file inline-supplementary-material-11.pdf]

## Protocol for a phase 3 trial to evaluate the effectiveness and safety of a heterologous, two-dose vaccine for Ebola virus disease in the Democratic Republic of the Congo

### Appendix 6

#### **Data and Safety Monitoring Board (DSMB)**

The following will be invited to participate on the Data and Safety Monitoring Board (DSMB) of this study. For detailed description of the DSMB responsibilities and activities, refer to the latest DSMB Charter.

Point of contact: Yazdan Yazdanpanah

|                                                                                                                                     |                                                                                              |
|-------------------------------------------------------------------------------------------------------------------------------------|----------------------------------------------------------------------------------------------|
| Yazdan Yazdanpanah<br>Adult Clinician<br>yazdan.yazdanpanah@aphp.fr                                                                 | Matthias Egger<br>Methodologist (DSMB Statistician)<br>matthias.egger@ispm.unibe.ch          |
| Ebunoluwa Adejuyigbe<br>Paediatrician<br>ebunadejuyigbe@hotmail.com                                                                 | Florian Marks<br>Vaccinologist/Epidemiologist<br>fmarks@ivi.int                              |
| Benoit Kebela Ilunga<br>Epidemiologist<br>kebelailunga@gmail.com                                                                    | Tamara Giles-Vernick<br>Social Scientist<br>tamara.giles-vernick@pasteur.fr                  |
| Oumou Younoussa Bah Sow<br>Ethicist; President of the National Committee of Ethics for Health Research (CNERES)<br>oumou45@yahoo.fr | Marie Onyamboko<br>Epidemiologist; Kinshasa School of Public Health<br>akatshimarie@yahoo.fr |

#### **Trial Steering Committee (TSC)**

The TSC is responsible for conducting the clinical study and for solving strategic problems that require high-level interventions.

Point of Contact: Richard Hatchett

|                                                                                                                                      |                                                                                                                                              |
|--------------------------------------------------------------------------------------------------------------------------------------|----------------------------------------------------------------------------------------------------------------------------------------------|
| Richard Hatchett/Gerald Voss<br>Coalition for Epidemic Preparedness Innovations<br>Richard.Hatchett@cepi.net<br>gerald.voss@cepi.net | Sylvain Yuma<br>Ministère de la Santé, DRC<br>sylvainyuma@gmail.com                                                                          |
| Daniel Bausch<br>UK Public Health Rapid Support Team/LSHTM<br>Daniel.Bausch@phe.gov.uk                                               | Jean-Jacques Muyembe-Tamfum (and Steve Ahuka)<br>Institut National de Recherche Biomédicale, DRC<br>jjmuyembet@gmail.com (amstev04@yahoo.fr) |
| Mike Ryan/Ana Maria Henaó-Restrepo<br>World Health Organization<br>ryanm@who.int; henaorestrepa@who.int                              | Jeremy Farrar/Josie Golding<br>Wellcome Trust<br>J.Farrar@wellcome.ac.uk<br>J.Golding@wellcome.ac.uk                                         |

|                                                                                                                                                |                                                                                                                                                                           |
|------------------------------------------------------------------------------------------------------------------------------------------------|---------------------------------------------------------------------------------------------------------------------------------------------------------------------------|
| Peter Piot/Deborah Watson-Jones<br>London School of Hygiene & Tropical Medicine<br>Peter.Piot@lshtm.ac.uk;<br>deborah.watson-jones@lshtm.ac.uk | Johan Van Hoof (and Macaya Douoguih)<br>Janssen Pharmaceuticals R&D<br>JVHOO1@its.jnj.com (MDouogui@its.jnj.com)                                                          |
| Rebecca F Grais<br>Director of Research<br>Epicentre MSF, Paris, France<br>rebecca.grais@epicentre.msf.org                                     | Isabelle Defourny/Clair Mills<br>MSF Operational Centre Paris<br>Médecins Sans Frontières, Paris, France<br>Isabelle.defourny@paris.msf.org;<br>Clair.Mills@paris.msf.org |
| Robert Kanwagi<br>World Vision<br>Robert.kanwagi@wveu.org                                                                                      |                                                                                                                                                                           |
